# Supplementary material for: Wrinkle-induced high sorption makes few-layered black phosphorus a superior adsorbent for ionic organic compounds
Source: Royal Society of Chemistry journal article supplement (doi:10.1039/c8en00266e), 2018-01-01
Supplement: c8en00266e1.pdf [file c8en00266e1.pdf]

## Electronic Supplementary Information

# Wrinkle-Induced High Sorption Makes Few-layered Black Phosphorus a Superior Adsorbent for Ionic Organic Compounds

Qing Zhao,<sup>†a</sup> Wei Ma,<sup>†a,b</sup> Bo Pan,<sup>c</sup> Qianru Zhang,<sup>a</sup> Xuejiao Zhang,<sup>\*a</sup> Siyu Zhang,<sup>\*a,d</sup>  
Baoshan Xing<sup>\*d</sup>

<sup>a</sup> Key Laboratory of Pollution Ecology and Environmental Engineering Institute of Applied Ecology, Chinese Academy of Sciences, Shenyang 110016, China. Email: zhangxuejiao@iae.ac.cn (Xuejiao Zhang); syzhang@iae.ac.cn (Siyu Zhang)

<sup>b</sup> University of Chinese Academy of Sciences Chinese Academy of Sciences Beijing 100049, China

<sup>c</sup> Faculty of Environmental Science & Engineering, Kunming University of Science & Technology, Kunming 650500, China

<sup>d</sup> Stockbridge School of Agriculture University of Massachusetts, Amherst, Massachusetts 01003, USA. E-mail: bx@umass.edu; Fax: +413 577 0242; Tel: +413 545 5212

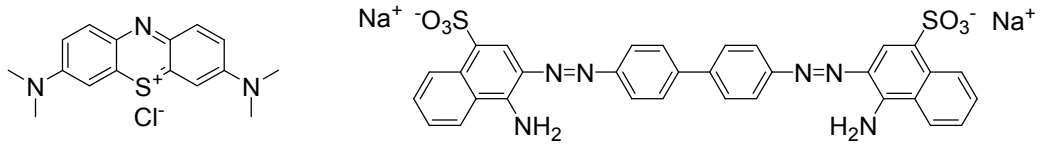

**Fig. S1** Chemical structures of methylene blue (left) and Congo red (right).

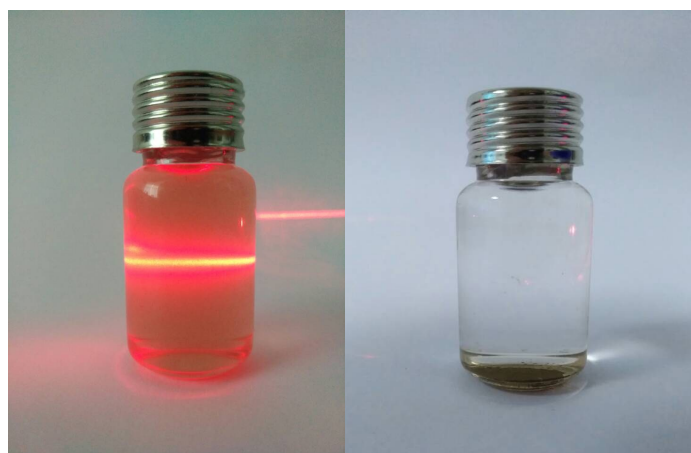

**Before Centrifugation    After Centrifugation**

**Fig. S2** Tyndal effect observation of the supernatant before and after centrifugation.

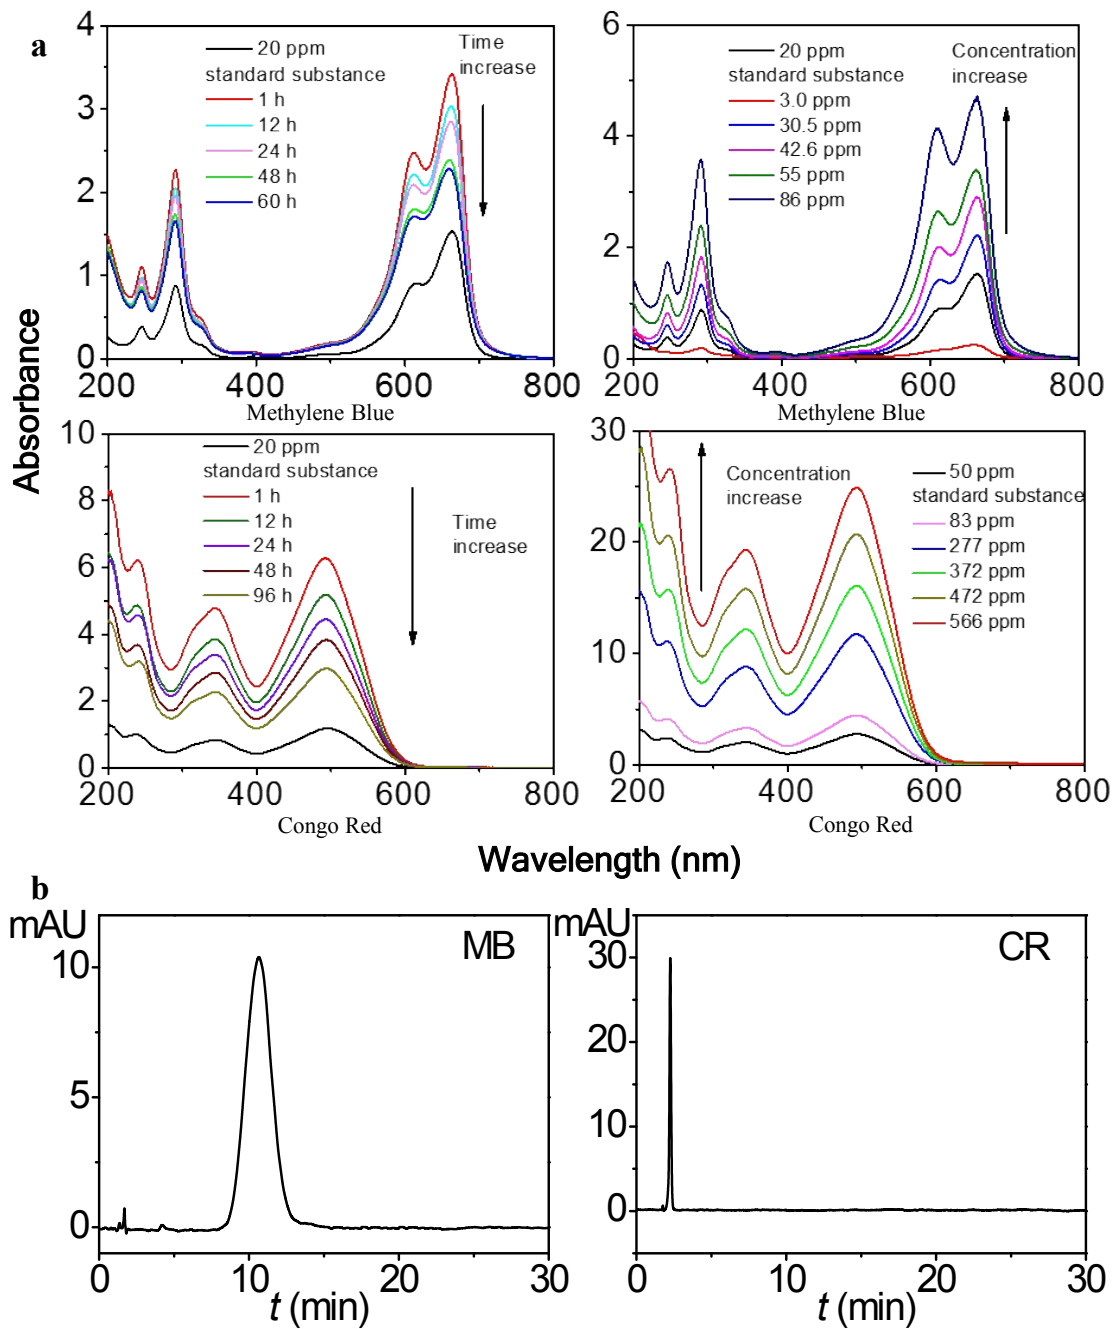

**Fig. S3** (a) UV-Vis spectra of MB and CR during sorption varied with time and initial concentration; (b) HPLC spectra of MB and CR after sorption. No new peaks were found in both spectra, suggesting no degradation occurred.

**Table S1.** Results of LM, FM, and DA models fitted sorption data of two dyes by few-layered BP <sup>a</sup>

| LM        |              |            |             |         |        |             |  |
|-----------|--------------|------------|-------------|---------|--------|-------------|--|
| Compounds | $Q^0$        | P of $Q^0$ | b           | P of b  | RMSEC  | $r_{adj}^2$ |  |
| MB        | 856.81±28.61 | <0.0001    | 0.011±0.001 | <0.0001 | 24.912 | 0.9870      |  |
| CR        | 218.59±4.90  | <0.0001    | 0.050±0.005 | <0.0001 | 9.227  | 0.9800      |  |

  

| FM        |            |            |             |         |       |             |  |
|-----------|------------|------------|-------------|---------|-------|-------------|--|
| Compounds | $K_f$      | P of $K_f$ | n           | P of n  | RMSEC | $r_{adj}^2$ |  |
| MB        | 38.77±6.67 | <0.0001    | 0.505±0.033 | <0.0001 | 38.81 | 0.9700      |  |
| CR        | 43.82±5.39 | <0.0001    | 0.283±0.024 | <0.0001 | 16.10 | 0.9394      |  |

  

| DA        |          |            |          |          |           |        |             |
|-----------|----------|------------|----------|----------|-----------|--------|-------------|
| Compounds | $Q^0$    | P of $Q^0$ | $E$      | P of $E$ | b         | RMSEC  | $r_{adj}^2$ |
| MB        | 1232±283 | <0.0001    | 20.3±0.9 | <0.0001  | 2.68±0.32 | 18.268 | 0.993       |
| CR        | 230±8.97 | <0.0001    | 26.6±0.1 | <0.0001  | 5.28±0.34 | 8.535  | 0.991       |

<sup>a</sup> All estimated parameter values, their standard error, probability of assuming the null hypothesis (p) and the fitting adjusted square of correlation coefficient ( $r_{adj}^2$ ) were determined by a commercial software program (Sigmaplot 11.1).

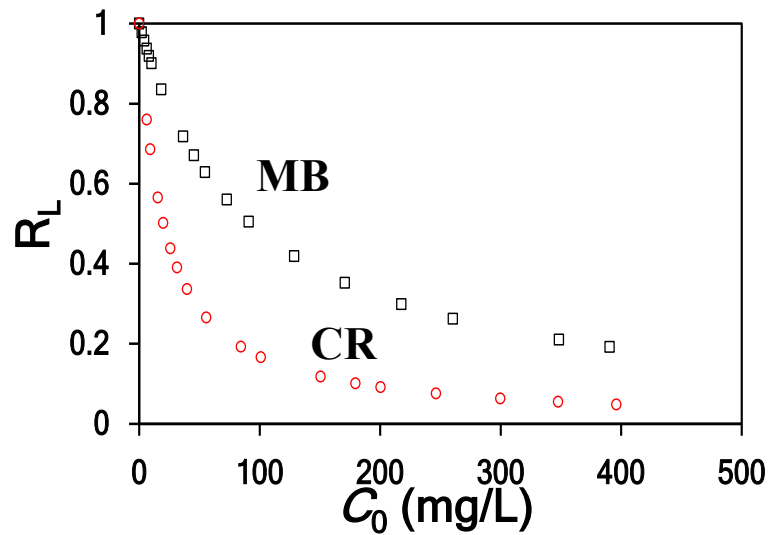

**Fig. S4** Variation of separation factor  $R_L$  with dyes' initial concentration  $C_0$ .

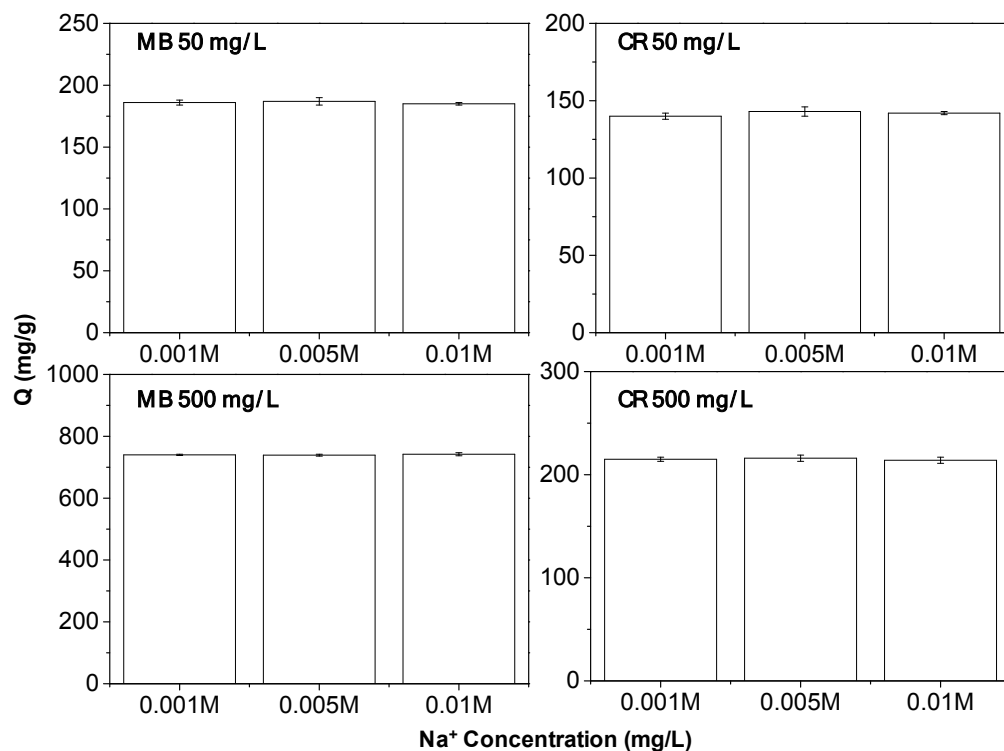

**Fig. S5** Comparison of amount sorption of two dyes at different  $Na^+$  concentration levels at initial concentration of 50 and 500 mg/L respectively.

**Table S2.** Results of PFOM, PSOM, and IPDM fitted with sorption kinetic data of two dyes by few-layered BP <sup>a</sup>

| PFOM      |              |            |                |            |        |             |
|-----------|--------------|------------|----------------|------------|--------|-------------|
| Compounds | $q_e$        | P of $q_e$ | $k_1$          | P of $k_1$ | RMSEC  | $r_{adj}^2$ |
| MB        | 174.32±16.81 | <0.0001    | -1.2725±0.6457 | <0.0001    | 36.923 | 0.5976      |
| CR        | 171.18±18.47 | <0.0001    | -0.0234±0.0057 | <0.0001    | 15.386 | 0.9048      |

  

| PSOM      |              |            |         |        |             |
|-----------|--------------|------------|---------|--------|-------------|
| Compounds | $q_e$        | P of $q_e$ | $k_2$   | RMSEC  | $r_{adj}^2$ |
| MB        | 251.52±14.99 | <0.0001    | 0.00088 | 32.277 | 0.9622      |
| CR        | 174.89±16.61 | <0.0001    | 0.00032 | 17.205 | 0.8867      |

  

| IPDM      |            |            |            |               |        |             |
|-----------|------------|------------|------------|---------------|--------|-------------|
| Compounds | $k_i$      | P of $k_i$ | $\theta$   | P of $\theta$ | RMSEC  | $r_{adj}^2$ |
| MB        | 27.24±1.85 | <0.0001    | 47.10±7.41 | <0.0001       | 13.403 | 0.947       |
| CR        | 14.55±0.47 | <0.0001    | 6.42±2.48  | <0.0001       | 4.973  | 0.984       |

<sup>a</sup> All estimated parameter values, their standard error, probability of assuming the null hypothesis (p) and the fitting adjusted square of correlation coefficient ( $r_{adj}^2$ ) were determined by a commercial software program (Sigmaplot 11.1).

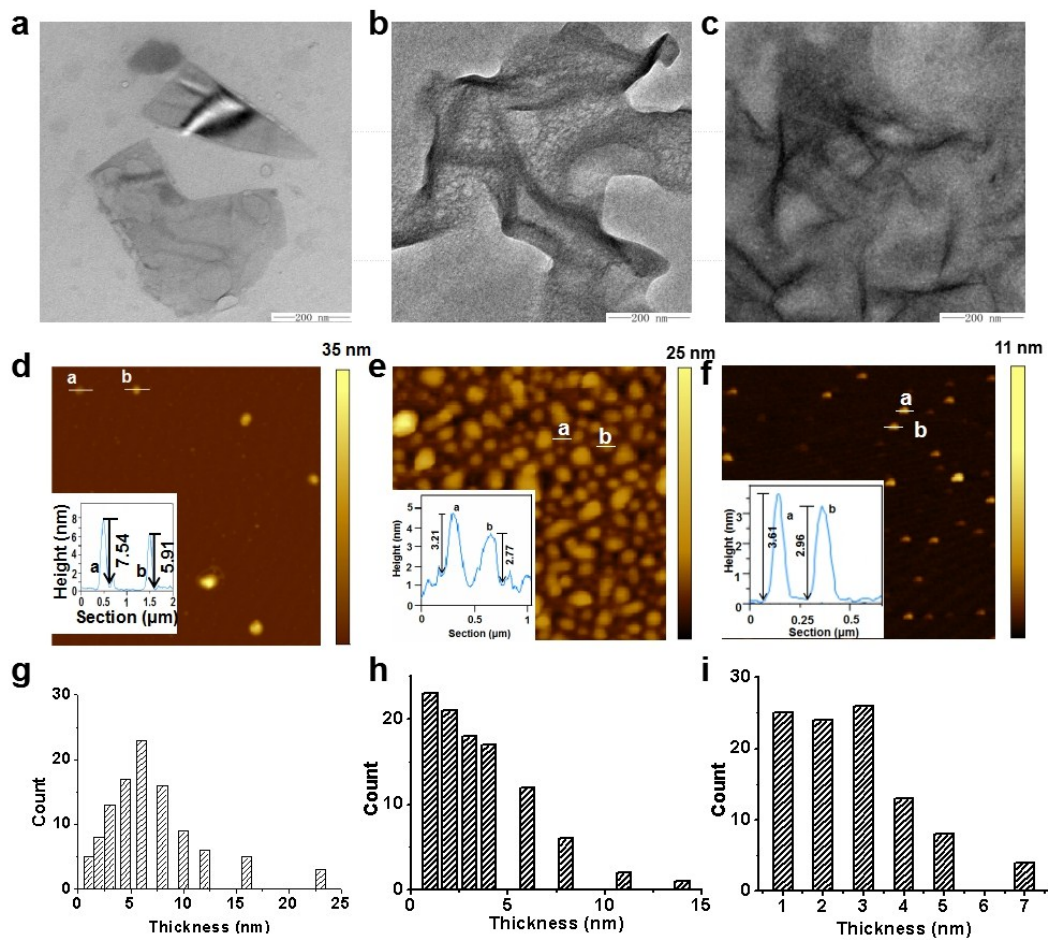

**Fig. S6** TEM images (a-c), AFM images (d-f), and statistical analysis of the thickness (g-i) of few-layered BP before (a, d, and g) and after sorption at the initial CR concentration of 50 mg/L (b, e, and h) and 500 mg/L (c, f, and i).



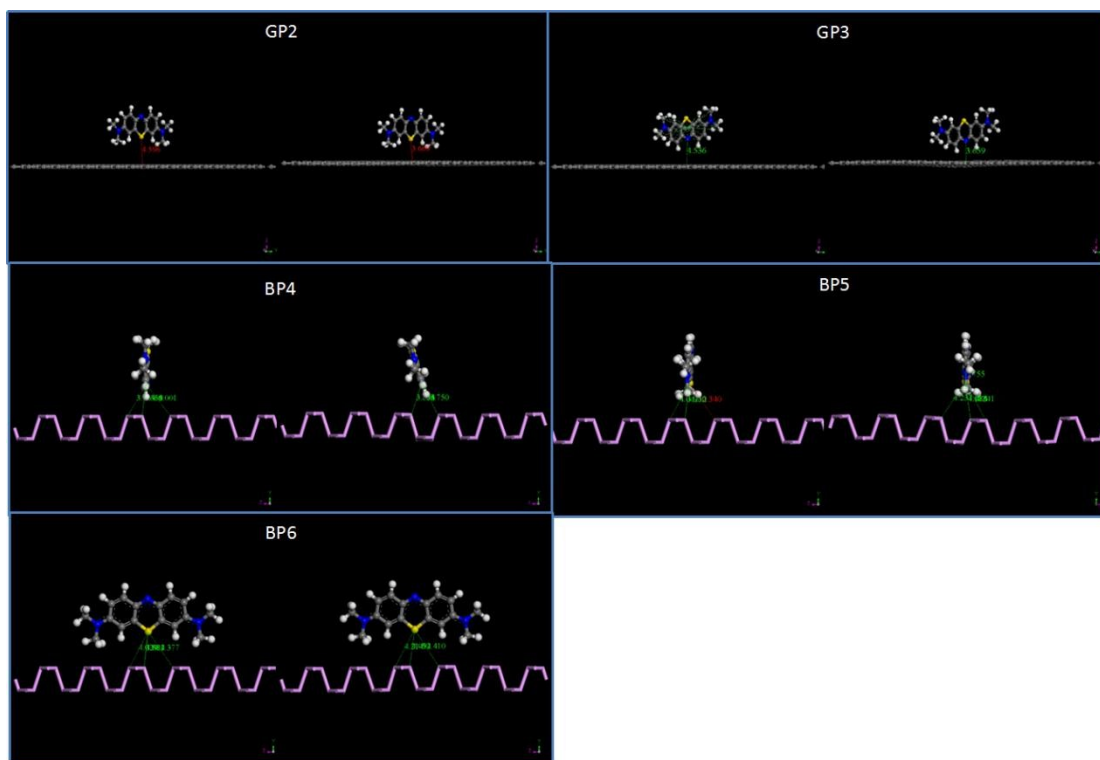

**Fig. S7** Intial (left panel) and energy minimized (right panel) configurations of adsorption complex, the relatively unfavorable cases: MB adsored on graphene (GP2-3) and phosphorene (BP4-6) (Dark gray balls: C atoms; Light gray balls: H atoms; blue balls: N atoms; yellow balls: S atoms; Pink balls: P atoms; Unit for distance is Å).
